# Supplementary material
Source: PubMed Central journal article supplement (PMC5839171)
Supplement: NIHMS944684-supplement-Supp1.pdf [file NIHMS944684-supplement-Supp1.pdf]

Supplementary Figure 1

Umbilical blood

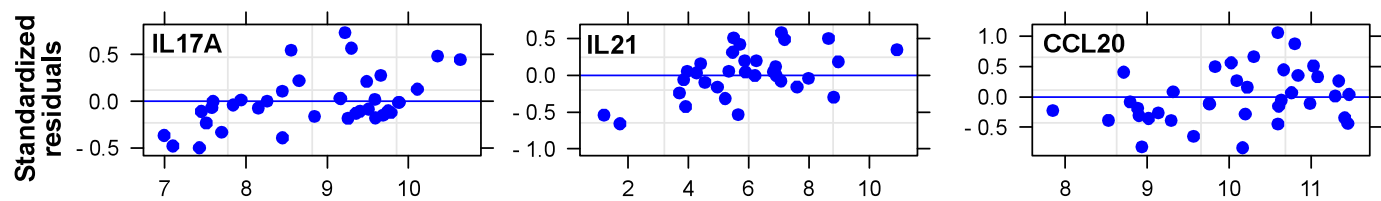

SLE

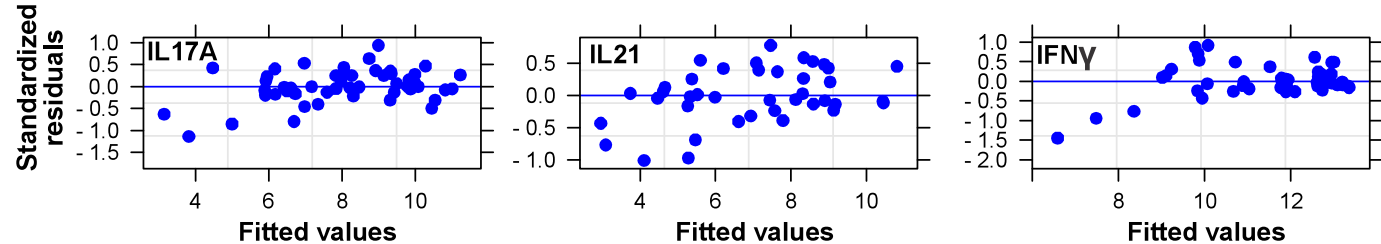

Supplementary Figure 2

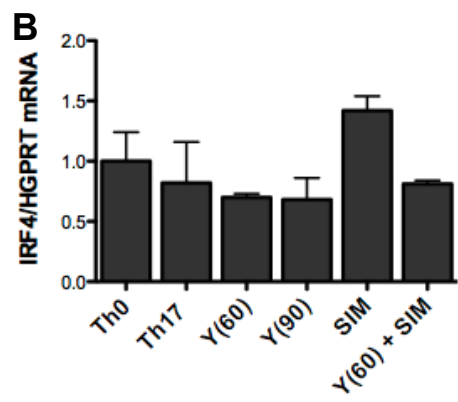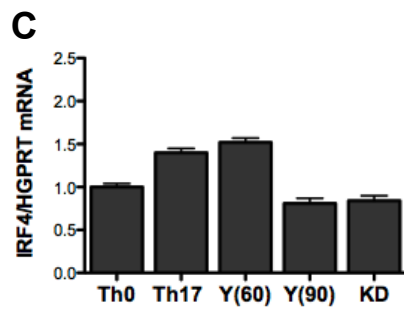

Supplementary Figure 3

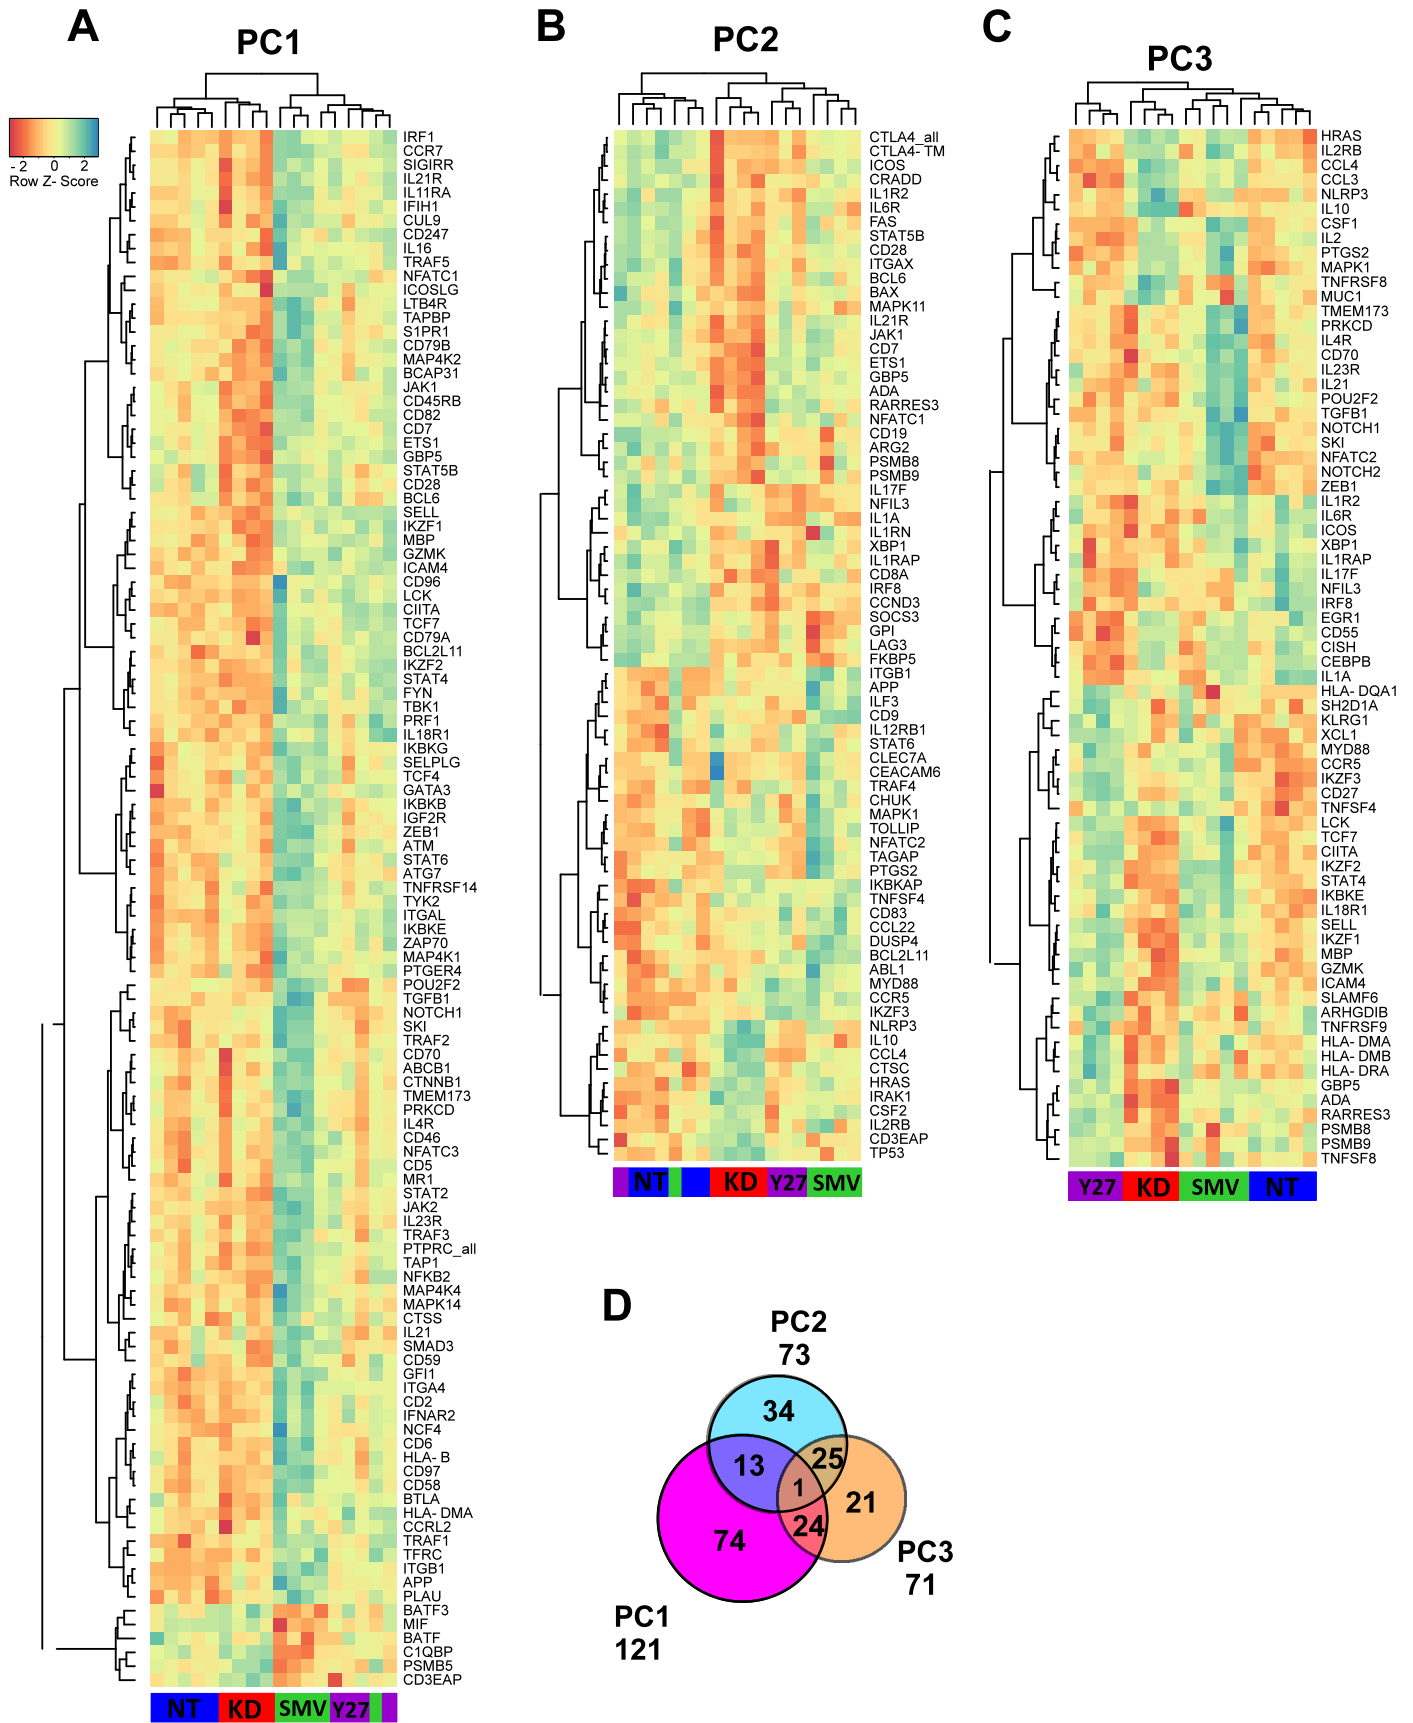

## Supplementary Figure 4

|                                                                          | term         | n. of term genes | corrected p-value | Y27632<br>KD026 |                                                                                                                                        |
|--------------------------------------------------------------------------|--------------|------------------|-------------------|-----------------|----------------------------------------------------------------------------------------------------------------------------------------|
| <b>Gene Ontology</b>                                                     |              |                  |                   |                 |                                                                                                                                        |
| leukocyte differentiation                                                | GO:0002521   | 258              | 4.80e-11          | 15              | CD79A,ZAP70,ITGA4,IRF1,CD27,ITGB1,IKZF3,SLAMF6,PTGER4,LCK,IKZF1                                                                        |
| transmembrane receptor protein tyrosine kinase signaling                 | GO:0007169   | 845              | 1.5e-07           | 19              | JAK2,ABL1,MAPK1,IL2RB,PSMB5,CD3EAP,CD8A,JAK1,CSF2,STAT5B,CD7,HRAS,CD19,CD28,IRAK1,MAPK11,PSMB8,PSMB9                                   |
| JAK-STAT cascade                                                         | GO:0007259   | 124              | 1.79e-04          | 8               | JAK2,MAPK1,IL10,NOTCH1,IL6R,CSF2,STAT5B                                                                                                |
| leukocyte proliferation                                                  | GO:0070661   | 161              | 1.74e-09          | 12              | CD79A,ZAP70,IRF1,XCL1,IKZF3,HLA-DPA1,HLA-DMB                                                                                           |
| positive regulation of proteolysis                                       | GO:0045862   | 316              | 4.81e-03          | 9               | FAS,TNFRSF1B,BAX,JAK2,PSMB5,CTSC,NLRP3,PSMB8,PSMB9                                                                                     |
| response to tumor necrosis factor                                        | GO:0034612   | 242              | 3.81e-05          | 10              | TNFRSF1B,TNFRSF9,JAK2,PSMB5,TNFSF4,TNFRSF8,PSMB8,PSMB9,CCL4,CCL3                                                                       |
| positive regulation of innate immune response                            | GO:0045089   | 315              | 3.10e-06          | 12              | MAPK1,PSMB5,NFATC2,C1QBP,IRF3,NFATC1,GBP5,HRAS,IRAK1,MAPK11,PSMB8,PSMB9                                                                |
| response to lipids                                                       | GO:0033993   | 351              | 7.49e-07          | 13              | FAS,TNFRSF1B,TNFRSF9,JAK2,TNFSF4,TNFRSF8,IL10,IL1RN,NLRP3,STAT5B,IRAK1,SIGIRR,CCL3                                                     |
| response to fibroblast growth factor                                     | GO:0071774   | 315              | 4.08e-05          | 11              | JAK2,MAPK1,IL2RB,PSMB5,JAK1,CSF2,HRAS,CD19,CD28,PSMB8,PSMB9                                                                            |
| Fc-epsilon receptor signaling pathway                                    | GO:0038095   | 326              | 1.89e-07          | 13              | JAK2,MAPK1,IL2RB,PSMB5,NFATC2,NFATC1,JAK1,CSF2,HRAS,CD19,CD28,PSMB8,PSMB9                                                              |
| activation of MAPKK activity                                             | GO:0000186   | 222              | 2.45e-04          | 9               | PSMB5,TP53,CRADD,MUC1,PSMB8,PSMB9                                                                                                      |
| positive regulation of cytokine production                               | GO:0001819   | 299              | 8.21e-09          | 13 14           | IRF1,XCL1,SLAMF6,STAT6,PTGER4,MYD88,TLR1,TBK1,HLA-DPA1,JAK2,C1QBP,TNFSF4,TNFRSF8,IRF3,IL10,GBP5,IL6R,NLRP3,CSF2,CD28,IRAK1,MAPK11,CCL3 |
| response to lipopolysaccharide                                           | GO:0032496   | 145              | 1.12e-08          | 11              | FAS,TNFRSF1B,TNFRSF9,JAK2,TNFSF4,TNFRSF8,IL10,NLRP3,IRAK1,SIGIRR,CCL3                                                                  |
| regulation of apoptotic process                                          | GO:0042981   | 1049             | 1.27e-09          | 23              | FAS,TNFRSF1B,TNFRSF9,BAX,JAK2,ABL1,IL2RB,PSMB5,C1QBP,BCL6,TNFRSF8,ETS1,IL10,TP53,NOTCH1,NLRP3,CSF2,MAP4K2,IRAK1,MUC1,PSMB8,PSMB9,CCL3  |
| leukocyte cell-cell adhesion                                             | GO:0007159   | 322              | 2.62e-12          | 17              | TNFSF4,IL10,CD8A,NLRP3,ICOS,CD7,CD28,ADA                                                                                               |
| <b>Biological pathways (KEGG)</b>                                        |              |                  |                   |                 |                                                                                                                                        |
| Influenza A                                                              | KEGG:05164   | 174              | 1.68e-07          | 7 12            |                                                                                                                                        |
| Inflammatory bowel disease (IBD)                                         | KEGG:05321   | 63               | 1.08e-09          | 10              | STAT4,STAT6,HLA-DMA,HLA-DRA,HLA-DPA1,HLA-DMB                                                                                           |
| Jak-STAT signaling pathway                                               | KEGG:04630   | 159              | 1.68e-07          | 10              | JAK2,IL2RB,IL21R,IL10,IL6R,JAK1,CSF2,STAT5B,HRAS                                                                                       |
| Herpes simplex infection                                                 | KEGG:05168   | 182              | 2.82e-07          | 12              |                                                                                                                                        |
| T cell receptor signaling pathway                                        | KEGG:04660   | 106              | 3.09e-07          | 10              | MAPK1,NFATC2,NFATC1,IL10,CD8A,ICOS,CSF2,HRAS,CD28,MAPK11                                                                               |
| Rheumatoid arthritis                                                     | KEGG:05323   | 86               | 1.13e-05          | 8               |                                                                                                                                        |
| AGE-RAGE signaling pathway in diabetic complications                     | KEGG:04933   | 102              | 7.35e-05          | 4               | BAX,JAK2,MAPK1,NFATC1,STAT5B,HRAS,MAPK11                                                                                               |
| <b>Biological pathways (Reactome)</b>                                    |              |                  |                   |                 |                                                                                                                                        |
| Interferon Signaling                                                     | REAC:913531  | 193              | 1.77e-03          | 8               | TYK2,IRF1,IFNAR1,IFNAR2,CIITA,HLA-DRA,HLA-DPA1                                                                                         |
| Translocation of ZAP-70 to Immunological synapse                         | REAC:202430  | 19               | 9.62e-06          | 5               | ZAP70,LCK,CD247,HLA-DRA,HLA-DPA1                                                                                                       |
| Immunoregulatory interactions between a Lymphoid and a non-Lymphoid cell | REAC:198933  | 149              | 9.43e-07          | 10              | ITGAL,ICAM4,ITGA4,KLRG1,ITGB1,CD96,SLAMF6,SH2D1A,SELL,CD247                                                                            |
| Signalling to ERKs                                                       | REAC:187687  | 247              | 3.05e-04          | 10              | JAK2,MAPK1,IL2RB,PSMB5,JAK1,CSF2,HRAS,MAPK11,PSMB8,PSMB9                                                                               |
| Signaling by Leptin                                                      | REAC:2586552 | 237              | 1.88e-05          | 11              | _____ // _____ // _____                                                                                                                |
| Signaling by PDGF                                                        | REAC:186797  | 349              | 1.30e-05          | 12              | JAK2,MAPK1,IL2RB,PSMB5,JAK1,CSF2,STAT5B,HRAS,CD19,CD28,PSMB8,PSMB9                                                                     |
| Signaling by ERBB4                                                       | REAC:1236394 | 315              | 3.85e-06          | 13              | _____ // _____ // _____                                                                                                                |
| Signaling by EGFR                                                        | REAC:177929  | 340              | 7.57e-04          | 11              | _____ // _____ // _____                                                                                                                |
| Signaling by SCF-KIT                                                     | REAC:1433557 | 311              | 3.30e-06          | 12              | _____ // _____ // _____                                                                                                                |
| Signaling by Interleukins                                                | REAC:449147  | 313              | 3.69e-9           | 16              | TOLLIP,JAK2,MAPK1,IL2RB,PSMB5,IL1R2,IL1RN,IL6R,JAK1,CSF2,STAT5B,HRAS,IRAK1,PSMB8,PSMB9                                                 |
| Interleukin-2 signaling                                                  | REAC:451927  | 248              | 3.00e-5           | 11              | JAK2,MAPK1,IL2RB,PSMB5,JAK1,CSF2,HRAS,MAPK11,PSMB8,PSMB9                                                                               |
